# Supplementary material for: New fused conjugated molecules with fused thiophene and pyran units for organic electronic materials
Source: Royal Society of Chemistry journal article supplement (doi:10.1039/d0ra01984d), 2020-01-01
Supplement: d0ra01984d1.pdf [file d0ra01984d1.pdf]

## Supporting Information

### **New fused conjugated molecules with fused thiophene and pyran units for organic electronic materials**

Daoliang Chen,<sup>a,b</sup> Danlei Zhu,<sup>a,b</sup> Gaobo Lin,<sup>a,b</sup> Mingxu Du,<sup>a</sup> Dandan Shi,<sup>a,b</sup> Qian Peng,<sup>a</sup> Lang Jiang,<sup>a</sup> Zitong Liu,<sup>a</sup> Guanxin Zhang,<sup>a</sup> Deqing Zhang\*<sup>a,b</sup>

## Table of Contents

|                                                                                                       |    |
|-------------------------------------------------------------------------------------------------------|----|
| 1. Experimental section.....                                                                          | 3  |
| 2. TGA analysis .....                                                                                 | 4  |
| 3. X-ray crystallographic data of <b>TTCTTC</b> and <b>TTTCTTTC</b> . .....                           | 5  |
| 4. DFT calculation. ....                                                                              | 8  |
| 5. Fluorescence spectra of <b>TTCTTC</b> and <b>TTTCTTTC</b> in solutions and solid states.....       | 9  |
| 6. ESR spectra of <b>TTCTTC</b> and <b>TTTCTTTC</b> in the presence of $\text{CF}_3\text{COOH}$ ..... | 10 |
| 7. UV-vis-NIR spectra of <b>TTCTTC</b> and <b>TTTCTTTC</b> after electrochemical oxidation .....      | 11 |
| 8. Transfer and output curves of OFETs with thin films of <b>TTCTTC</b> and <b>TTTCTTTC</b> .....     | 11 |
| 9. XRD patterns of <b>TTCTTC</b> and <b>TTTCTTTC</b> films deposited at different temperatures .....  | 13 |
| 10. AFM images of <b>TTCTTC</b> deposited at different temperatures .....                             | 13 |
| 11. AFM images of <b>TTTCTTTC</b> deposited at different temperatures .....                           | 13 |
| 12. References.....                                                                                   | 14 |
| 13. NMR Spectra. ....                                                                                 | 15 |

## 1. Experimental section

$^1\text{H}$  NMR and  $^{13}\text{C}$  NMR spectra were recorded on a Bruker Fourier 300, AVANCE III 400 MHz and 500 MHz spectrometers. High resolution mass spectra (HRMS) were determined on Matrix-Assisted Laser Desorption/ Ionization Time of Flight Mass Spectrometry (MALDI-TOF) and electrospray ionization mass spectrometry (ESI-MS). Elemental analysis was performed on a Carlo Erba model 1160 elemental analyzer. TGA-DTA measurements from 30 °C to 600 °C were carried out on a Shimadzu DTG-60 instrument under dry nitrogen flow with a heating rate of 10 °C/min. Jasco V-570 UV-vis spectrophotometer was utilized to measure the solution and thin-film absorption spectra, while a Hitachi (F4500) spectrophotometer was used to record the solution and solid state fluorescence spectra at 25°C. Fluorescence quantum yields and fluorescence lifetimes were measured with a Hamamatsu absolute PL quantum yield spectrometer C11347 Quantaaurus QY and the compact fluorescence lifetime spectrometer C11367 of Hamamatsu, respectively. PL images were recorded with an Olympus research inverted system microscope equipped with a CCD camera; a mercury lamp equipped with a band pass filter ( $\lambda = 330\text{-}380$  nm) was utilized as the excitation source. Cyclic voltammograms were measured on computer controlled CHI660C instruments at room temperature; the measurements were performed in a conventional three-electrode cell using a Pt working electrode, a Pt counter electrode, and a Ag/AgCl (saturated KCl) reference electrode, and *n*-Bu<sub>4</sub>NPF<sub>6</sub> (0.1 M) as the supporting electrolyte with a scan rate of 100 mV·s<sup>-1</sup>. To calibrate the redox potentials, the cyclic voltammogram of ferrocene was measured under the same conditions. Single crystals of **TTCTTC** and **TTTCTTTC** was cultivated by slowly cooling their hot solutions in toluene. The diffraction data of single crystals were collected on a Rigaku Saturn diffractometer with a CCD area detector. All calculations were performed with the SHELXS-97 programs. Crystallographic data for the structure reported in this paper were deposited in the Cambridge Crystallographic Data Centre (CCDC: 1963694 for compound **TTCTTC**, 1975874 for compound **TTTCTTTC**). X-ray diffraction (XRD) patterns of the thin films were carried out in the reflection mode at room temperature using a 2 kW Rigaku X-ray diffraction system.

## 2. TGA analysis

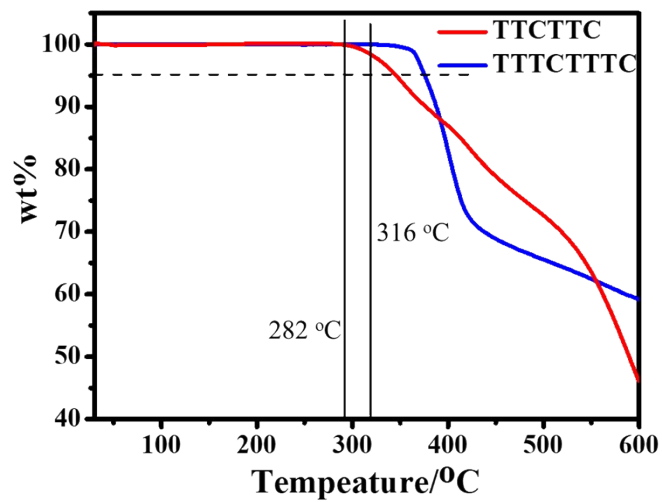

**Figure S1.** TGA curves of TTCTTC and TTTCTTTC from 30-600 °C.

### 3. X-ray crystallographic data of TTCTTC and TTTCTTTC.

**Table S1.** X-ray crystallographic data of TTCTTC and TTTCTTTC

| Compound                        | TTCTTC                                                                                                                                                   | TTTCTTTC                                                                                                                                              |
|---------------------------------|----------------------------------------------------------------------------------------------------------------------------------------------------------|-------------------------------------------------------------------------------------------------------------------------------------------------------|
| CCDC No.                        | 1963694                                                                                                                                                  | 1975874                                                                                                                                               |
| Empirical formula               | C <sub>38</sub> H <sub>40</sub> O <sub>2</sub> S <sub>4</sub>                                                                                            | C <sub>42</sub> H <sub>40</sub> O <sub>2</sub> S <sub>6</sub>                                                                                         |
| Formula weight                  | 656.94                                                                                                                                                   | 769.10                                                                                                                                                |
| Temperature                     | 170.00(11) K                                                                                                                                             | 170.00(12) K                                                                                                                                          |
| Wavelength                      | 0.71073 Å                                                                                                                                                | 0.71073 Å                                                                                                                                             |
| Crystal system, space group     | Triclinic, P-1                                                                                                                                           | Triclinic, P-1                                                                                                                                        |
| Unit cell dimensions            | $a = 5.34500(10)$ Å<br>$\alpha = 101.923(2)^\circ$<br>$b = 8.3039(2)$ Å<br>$\beta = 93.255(2)^\circ$<br>$c = 18.8962(4)$ Å<br>$\gamma = 98.322(2)^\circ$ | $a = 8.1600(3)$ Å<br>$\alpha = 87.738(3)^\circ$<br>$b = 8.4682(4)$ Å<br>$\beta = 87.241(3)^\circ$<br>$c = 13.9854(5)$ Å<br>$\gamma = 71.942(4)^\circ$ |
| Volume                          | 808.70(3) Å <sup>3</sup>                                                                                                                                 | 916.0(3) Å <sup>3</sup>                                                                                                                               |
| Z, Calculated density           | 1, 1.349 Mg/m <sup>3</sup>                                                                                                                               | 1, 1.392 Mg/m <sup>3</sup>                                                                                                                            |
| Absorption coefficient          | 2.959 mm <sup>-1</sup>                                                                                                                                   | 3.731                                                                                                                                                 |
| F(000)                          | 348                                                                                                                                                      | 404                                                                                                                                                   |
| Crystal size                    | 0.2 x 0.05 x 0.05 mm <sup>3</sup>                                                                                                                        | 0.23 × 0.07 × 0.01                                                                                                                                    |
| Theta range for data collection | 4.798 to 150.886°                                                                                                                                        | 6.33 to 151.146°                                                                                                                                      |
| Limiting indices                | -6 ≤ h ≤ 5,<br>-10 ≤ k ≤ 10,<br>-23 ≤ l ≤ 23                                                                                                             | -10 ≤ h ≤ 10,<br>-8 ≤ k ≤ 10,<br>-17 ≤ l ≤ 17                                                                                                         |
| Reflections collected/unique    | 9092/3194 [R(int) = 0.0514, R <sub>sigma</sub> = 0.0489]                                                                                                 | 11695/3633 [R <sub>int</sub> = 0.0561, R <sub>sigma</sub> = 0.0488]                                                                                   |
| Absorption correction           | Semi-empirical from equivalents                                                                                                                          | Semi-empirical from equivalents                                                                                                                       |
| Max. and min. transmission      | 1.0000 and 0.82621                                                                                                                                       | -                                                                                                                                                     |
| Refinement method               | Full-matrix least-squares on F2                                                                                                                          | Full-matrix least-squares on F2                                                                                                                       |
| Data / restraints / parameters  | 6059 / 134 / 508                                                                                                                                         | 3633/0/228                                                                                                                                            |
| Goodness-of-fit on F2           | 1.051                                                                                                                                                    | 1.056                                                                                                                                                 |
| Final R indices [I > 2σ(I)]     | R <sub>1</sub> = 0.0455, wR <sub>2</sub> = 0.1057                                                                                                        | R <sub>1</sub> = 0.0897, wR <sub>2</sub> = 0.2433                                                                                                     |
| R indices (all data)            | R <sub>1</sub> = 0.0630, wR <sub>2</sub> = 0.1185                                                                                                        | R <sub>1</sub> = 0.0992, wR <sub>2</sub> = 0.2565                                                                                                     |
| Largest diff. peak and hole     | 0.41 and -0.38 e.Å <sup>-3</sup>                                                                                                                         | 1.26 and -0.55 e.Å <sup>-3</sup>                                                                                                                      |

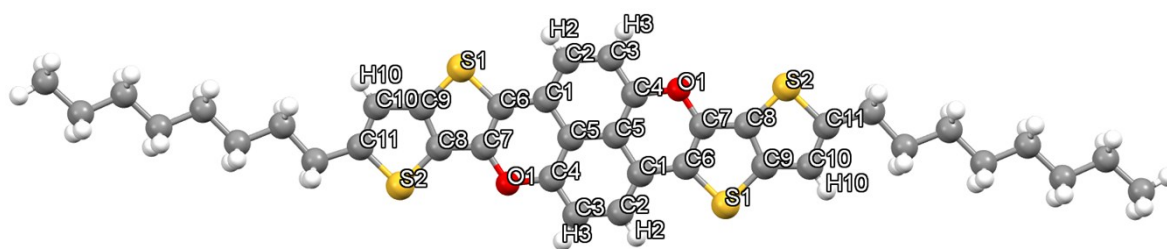

Figure S2. Molecular structure of TTCTTC.

Table S2. Selected bond lengths of TTCTTC

| Bond lengths from crystal structure |           | Bond lengths from the optimized structure |           |
|-------------------------------------|-----------|-------------------------------------------|-----------|
| Atoms 1,2                           | d 1,2 [Å] | Atoms 1,2                                 | d 1,2 [Å] |
| S1-C6                               | 1.741     | S1-C6                                     | 1.764     |
| S1-C9                               | 1.733     | S1-C9                                     | 1.753     |
| S2-C8                               | 1.719     | S2-C8                                     | 1.743     |
| S2-C11                              | 1.752     | S2-C11                                    | 1.776     |
| O1-C4                               | 1.398     | O1-C4                                     | 1.385     |
| O1-C7                               | 1.370     | O1-C7                                     | 1.364     |
| C1-C2                               | 1.374     | C1-C2                                     | 1.388     |
| C1-C5a                              | 1.430     | C1-C5a                                    | 1.434     |
| C1-C6 <sup>i</sup>                  | 1.447     | C1-C6 <sup>i</sup>                        | 1.447     |
| C2-C3                               | 1.401     | C2-C3                                     | 1.408     |
| C3-C4                               | 1.369     | C3-C4                                     | 1.380     |
| C4-C5                               | 1.413     | C4-C5                                     | 1.422     |
| C5-C5a                              | 1.417     | C5-C5a                                    | 1.424     |
| C6-C7                               | 1.368     | C6-C7                                     | 1.377     |
| C7-C8                               | 1.411     | C7-C8                                     | 1.417     |
| C8-C9                               | 1.385     | C8-C9                                     | 1.388     |
| C9-C10                              | 1.423     | C9-C10                                    | 1.425     |
| C10-C11                             | 1.361     | C10-C11                                   | 1.371     |

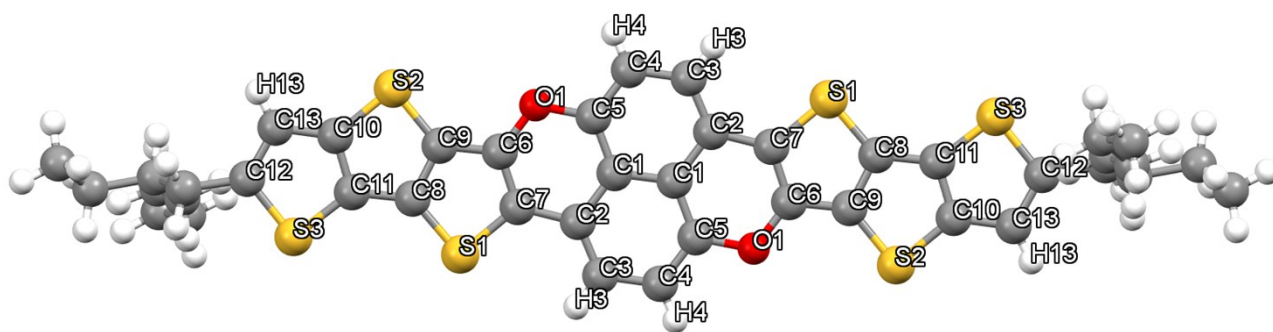

**Figure S3.** Molecular structure of TTTCTTTC.

**Table S3.** Selected bond lengths of TTTCTTTC.

| Bond lengths from crystal structure |           | Bond lengths from the optimized structure |           |
|-------------------------------------|-----------|-------------------------------------------|-----------|
| Atoms 1,2                           | d 1,2 [Å] | Atoms 1,2                                 | d 1,2 [Å] |
| S1-C7                               | 1.742     | S1-C7                                     | 1.754     |
| S1-C8                               | 1.718     | S1-C8                                     | 1.749     |
| S2-C9                               | 1.725     | S2-C9                                     | 1.756     |
| S2-C10                              | 1.743     | S2-C10                                    | 1.754     |
| S3-C11                              | 1.721     | S3-C11                                    | 1.742     |
| S3-C12                              | 1.744     | S3-C12                                    | 1.769     |
| O1-C5                               | 1.388     | O1-C5                                     | 1.386     |
| O1-C6                               | 1.367     | O1-C6                                     | 1.363     |
| C1-C2                               | 1.429     | C1-C2                                     | 1.434     |
| C1-C5                               | 1.413     | C1-C5                                     | 1.422     |
| C2-C3                               | 1.361     | C2-C3                                     | 1.388     |
| C3-C4                               | 1.412     | C3-C4                                     | 1.408     |
| C1-C1a                              | 1.416     | C1-C1a                                    | 1.424     |
| C4-C5                               | 1.369     | C4-C5                                     | 1.388     |
| C2-C7                               | 1.454     | C2-C7                                     | 1.446     |
| C6-C7                               | 1.358     | C6-C7                                     | 1.377     |
| C6-C9                               | 1.419     | C6-C9                                     | 1.415     |
| C8-C9                               | 1.388     | C8-C9                                     | 1.393     |
| C8-C11                              | 1.430     | C8-C11                                    | 1.419     |
| C10-C11                             | 1.375     | C10-C11                                   | 1.394     |
| C12-C13                             | 1.368     | C12-C13                                   | 1.373     |

## 4. DFT calculations

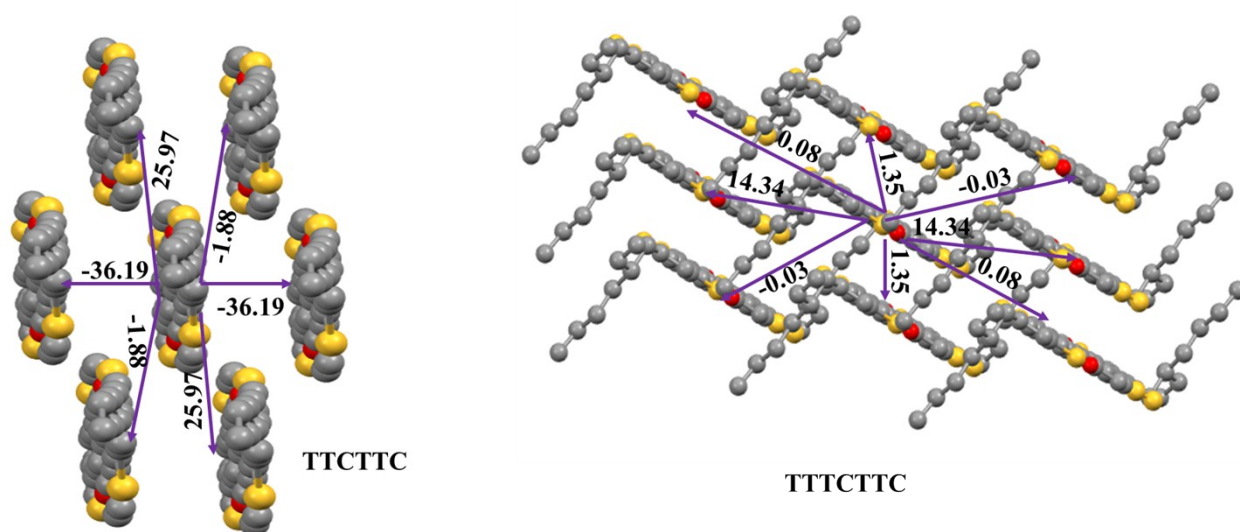

**Figure S4.** Calculated transfer integrals (meV) of TTCTTC and TTTCTTTC by using the popular long-range functional  $\omega$ B97XD with optimized  $\omega=0.00168$  and 6-31G(d) basis set.

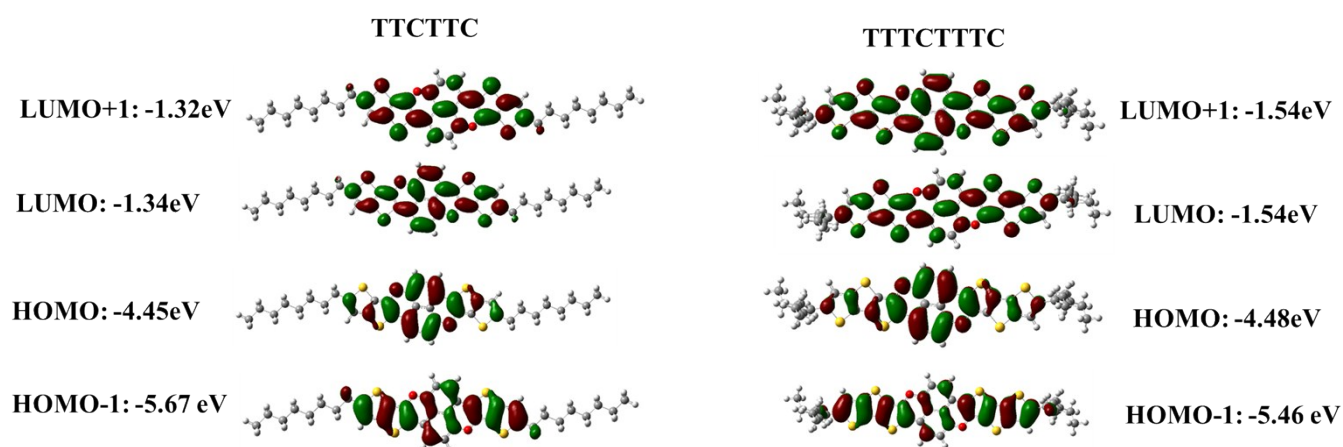

**Figure S5.** Energy levels of TTCTTC and TTTCTTTC calculated at PCM-B3LYP/6-31G(d) level.

**Table S4.** The electronic transitions with transition energy lower than 4.3803 eV (280nm) and the oscillator strengths ( $f$ ) with their values larger than 0.01 at PCM-B3LYP/6-31G(d) level.

|                       | TTCTTC                                                     | TTTCTTTC                                                     |
|-----------------------|------------------------------------------------------------|--------------------------------------------------------------|
| $S_0 \rightarrow S_2$ | 2.69 eV (461.1nm)<br>$f=0.7906$<br>HOMO $\rightarrow$ LUMO | 2.53 eV (490.9nm)<br>$f=1.0733$<br>HOMO $\rightarrow$ LUMO+1 |
| $S_0 \rightarrow S_3$ | 3.32 eV (373.9nm)<br>$f=0.0917$                            | 3.28 eV (378.5nm)<br>$f=0.0881$                              |



|                       |                                                                                                           |                                                                                                          |
|-----------------------|-----------------------------------------------------------------------------------------------------------|----------------------------------------------------------------------------------------------------------|
| $S_0 \rightarrow S_4$ | 3.84 eV (323.0nm)<br>$f=0.0693$                                                                           | <b>3.55 eV (349.3 nm)</b><br><b><math>f=1.3688</math></b><br><b>HOMO-1 <math>\rightarrow</math> LUMO</b> |
| $S_0 \rightarrow S_6$ | <b>3.95 eV (313.8nm)</b><br><b><math>f=1.0662</math></b><br><b>HOMO-1 <math>\rightarrow</math> LUMO+1</b> | 3.66 eV (340.1nm)<br>$f=0.0062$                                                                          |

## 5. Fluorescence spectra of TTCTTC and TTTCTTTC in solutions and solid states

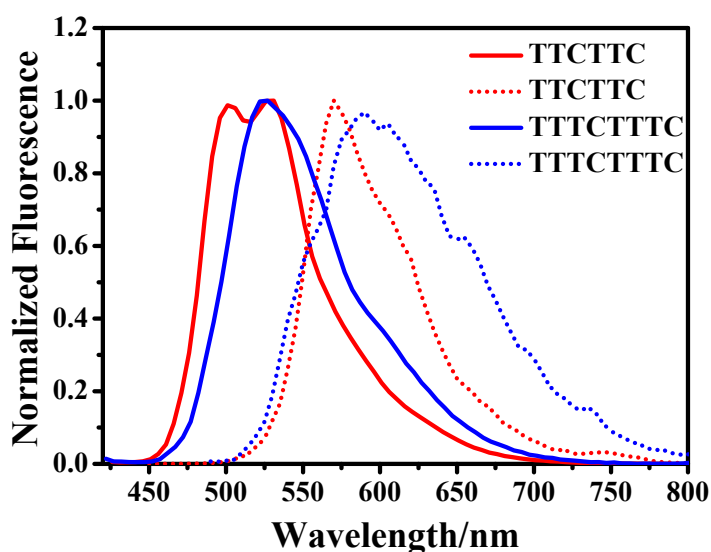

**Figure S6.** Fluorescence spectra of TTCTTC and TTTCTTTC in solutions (solid line) and solid states (dotted line).

**Table S5.** Photoluminescence data of TTCTTC and TTTCTTTC in solutions and solid states

| Compd.          | Solution                  |                 |                                | Solid State               |                 |                                |
|-----------------|---------------------------|-----------------|--------------------------------|---------------------------|-----------------|--------------------------------|
|                 | PL<br>$\lambda_{em.}(nm)$ | $\Phi^a$<br>(%) | $\langle\tau\rangle^b$<br>(ns) | PL<br>$\lambda_{em.}(nm)$ | $\Phi^a$<br>(%) | $\langle\tau\rangle^b$<br>(ns) |
| <b>TTCTTC</b>   | 503, 529                  | 13.8            | 3.56                           | 571                       | <b>16.5</b>     | 1.64                           |
| <b>TTTCTTTC</b> | 526                       | 13.6            | 3.35                           | 587                       | 1.5             | 1.26                           |

[a] The quantum yields in solutions (10  $\mu$ M in  $CH_2Cl_2$ ) and in the solid states were measured with the Hamamatsu spectrometer C11347 Quantaurus-QY. [b] Fluorescence lifetimes in solutions (10  $\mu$ M in  $CH_2Cl_2$ ) and in the solid state were measured with the Hamamatsu spectrometer C11367.

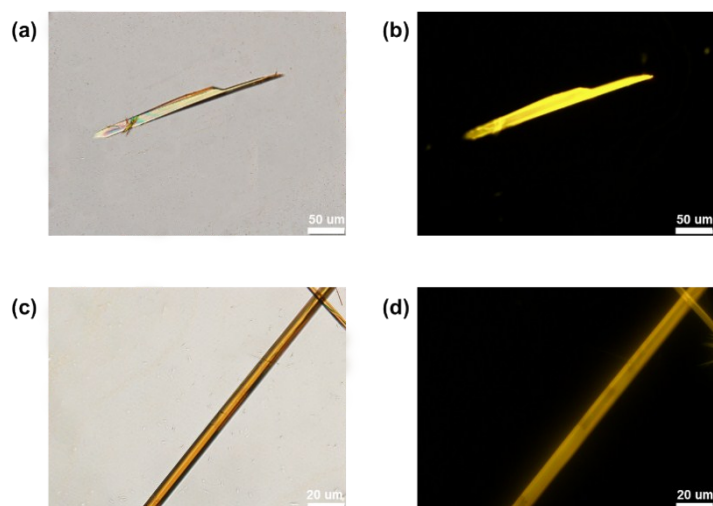

**Figure S7.** The microscope (a, c) and fluorescence microscope (b, d) ( $\lambda_{\text{ex}} = 330\text{-}380\text{ nm}$ ) images of TTCTTC and TTTCTTTC crystals, respectively.

## 6. ESR spectra of TTCTTC and TTTCTTTC in the presence of $\text{CF}_3\text{COOH}$

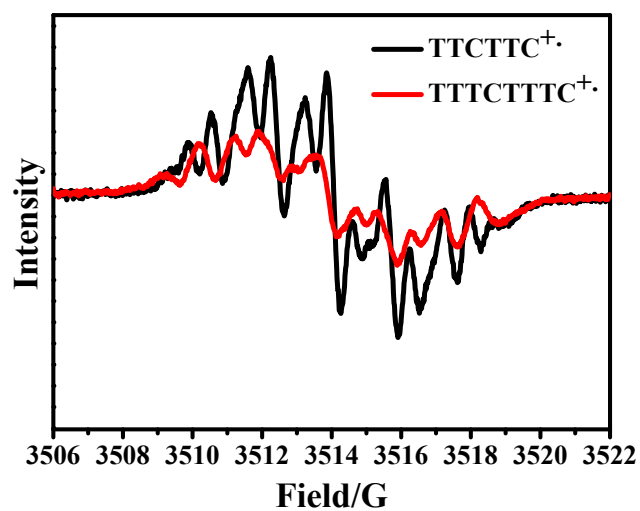

**Figure S8.** ESR spectra of  $\text{CH}_2\text{Cl}_2$  solution of TTCTTC and TTTCTTTC in the presence of 1%wt TFA ( $\text{CF}_3\text{COOH}$ ).

## 7. UV-vis-NIR spectra of TTCTTC and TTTCTTTC after electrochemical oxidation

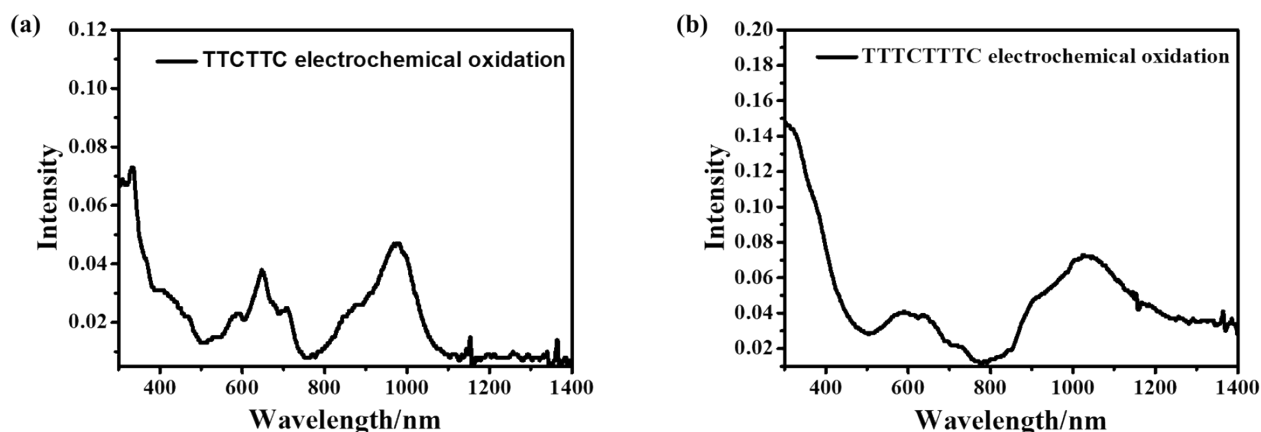

**Figure S9.** The UV-vis-NIR spectra of solutions of TTCTTC (a, 10  $\mu\text{M}$ ) and TTTCTTTC (b, 10  $\mu\text{M}$ ) after electrochemical oxidation. The spectroelectrochemical experiments were carried out in 1 mm spectroelectrochemical cell containing platinum minigrad working electrode, Pt counter electrode and Ag/AgCl reference electrode. The spectra were recorded after the solutions were applied an oxidation potential at +0.6 V (vs Ag/AgCl) for 30 min.

## 8. Transfer and output curves of OFETs with thin films of TTCTTC and TTTCTTTC

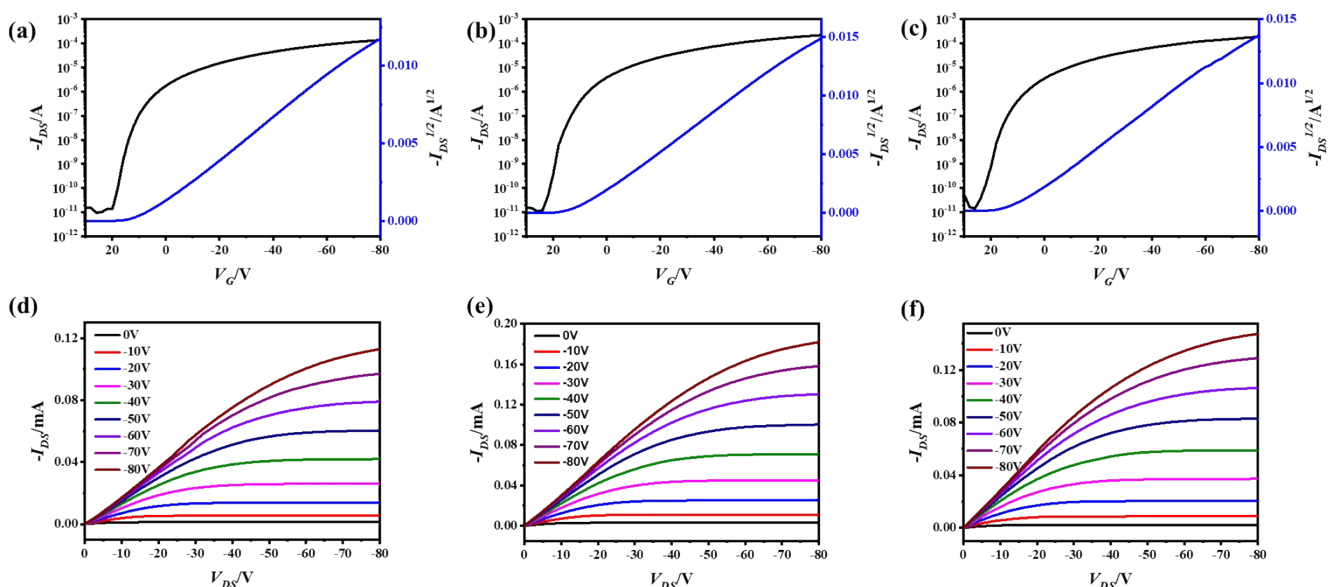

**Figure S10.** Transfer (a, b and c) and output (d, e and f) characteristics of OFETs with thin films of TTCTTC deposited on OTS-modified  $\text{SiO}_2/\text{Si}$  substrate at 25  $^\circ\text{C}$  (a and d), 50  $^\circ\text{C}$  (b and e) and 90  $^\circ\text{C}$  (c and f).

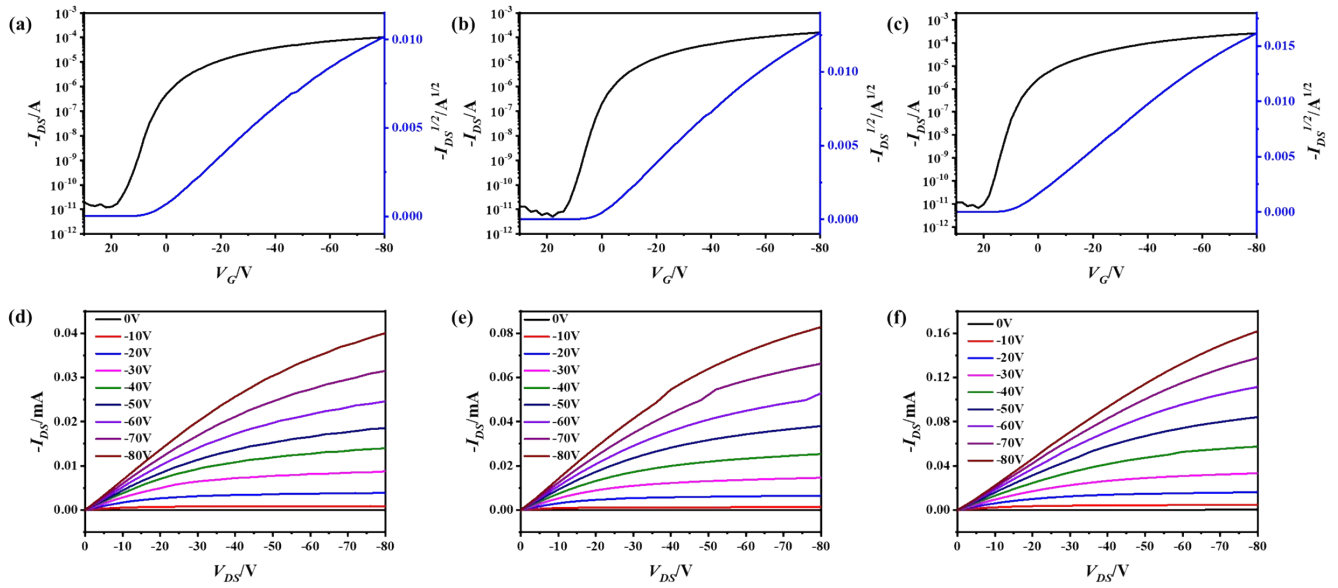

**Figure S11.** Transfer (a, b and c) and output (d, e and f) characteristics of OFETs with thin films of **TTTCTTC** deposited on OTS-modified SiO<sub>2</sub>/Si substrate at 25 °C (a and d), 50 °C (b and e) and 90 °C (c and f).

**Table S6.** The performance data for OFETs with thin films of **TTCTTC** and **TTTCTTC**

| Compd.         | Substrate temp. (°C) | $\mu_{\max}$ [cm <sup>2</sup> V <sup>-1</sup> s <sup>-1</sup> ] | $\mu_{\text{average}}^a$ [cm <sup>2</sup> V <sup>-1</sup> s <sup>-1</sup> ] | On/off ratio      | Threshold (V) |
|----------------|----------------------|-----------------------------------------------------------------|-----------------------------------------------------------------------------|-------------------|---------------|
| <b>TTCTTC</b>  | 90                   | 0.26                                                            | 0.20                                                                        | 1x10 <sup>7</sup> | 10 V          |
|                | 50                   | 0.39                                                            | 0.25                                                                        | 2x10 <sup>7</sup> | 13 V          |
|                | 25                   | 0.31                                                            | 0.19                                                                        | 1x10 <sup>7</sup> | 9 V           |
| <b>TTTCTTC</b> | 90                   | 0.031                                                           | 0.017                                                                       | 2x10 <sup>7</sup> | 7 V           |
|                | 50                   | 0.025                                                           | 0.013                                                                       | 2x10 <sup>7</sup> | 2 V           |
|                | 25                   | 0.016                                                           | 0.008                                                                       | 5x10 <sup>7</sup> | 3 V           |

[a] based on 10 devices

## 9. XRD patterns of TTCTTC and TTTCTTTC films deposited at different temperatures

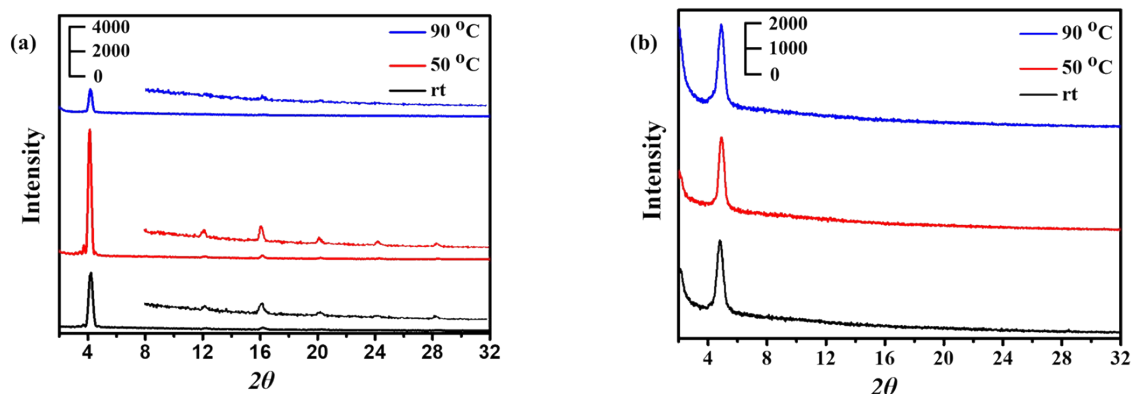

**Figure S12.** XRD patterns of thin-films of TTCTTC (a) and TTTCTTTC (b) deposited on OTS-modified SiO<sub>2</sub>/Si substrates at different temperatures (a, 25 °C; b, 50 °C; c, 90 °C).

## 10. AFM images of TTCTTC deposited at different temperatures

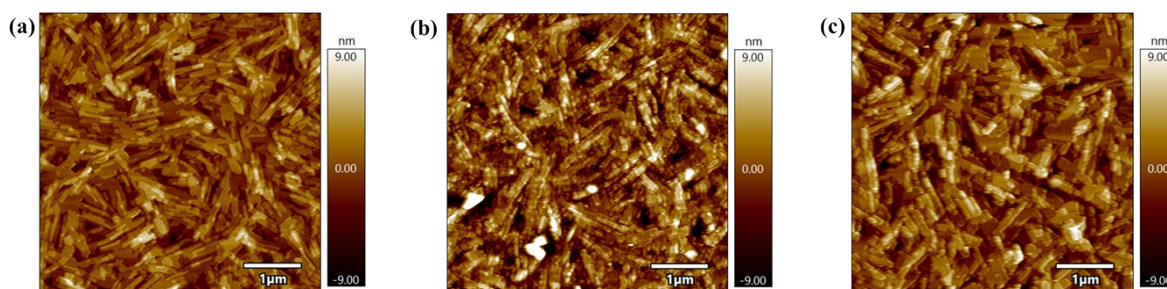

**Figure S13.** AFM height images of thin-films of TTCTTC deposited on OTS-modified SiO<sub>2</sub>/Si substrates at different temperatures (a, 25 °C; b, 50 °C; c, 90 °C).

## 11. AFM images of TTTCTTTC deposited at different temperatures

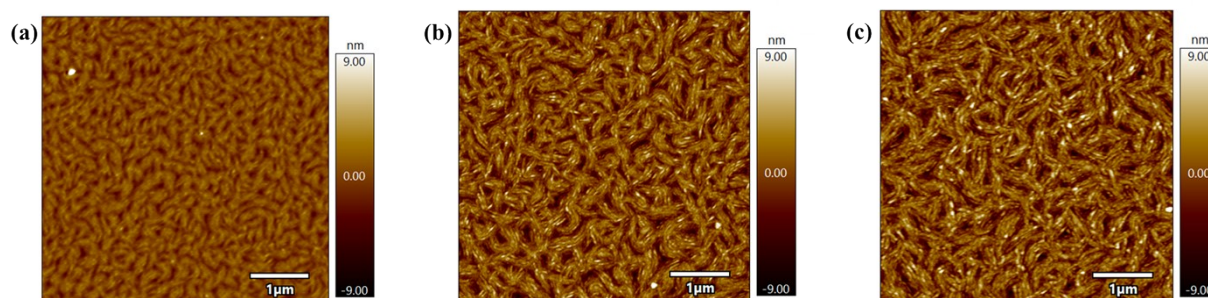

**Figure S14.** AFM height images of thin-films of TTTCTTTC deposited on OTS-modified SiO<sub>2</sub>/Si substrates at different temperatures (a, 25 °C; b, 50 °C; c, 90 °C).

## 12. References

- [1] Gaussian 09, Revision A.02, M. J. Frisch, G. W. Trucks, H. B. Schlegel, G. E. Scuseria, M. A. Robb, J. R. Cheeseman, G. Scalmani, V. Barone, B. Mennucci, G. A. Petersson, H. Nakatsuji, M. Caricato, X. Li, H. P. Hratchian, A. F. Izmaylov, J. Bloino, G. Zheng, J. L. Sonnenberg, M. Hada, M. Ehara, K. Toyota, R. Fukuda, J. Hasegawa, M. Ishida, T. Nakajima, Y. Honda, O. Kitao, H. Nakai, T. Vreven, J. A. Montgomery, Jr., J. E. Peralta, F. Ogliaro, M. Bearpark, J. J. Heyd, E. Brothers, K. N. Kudin, V. N. Staroverov, R. Kobayashi, J. Normand, K. Raghavachari, A. Rendell, J. C. Burant, S. S. Iyengar, J. Tomasi, M. Cossi, N. Rega, J. M. Millam, M. Klene, J. E. Knox, J. B. Cross, V. Bakken, C. Adamo, J. Jaramillo, R. Gomperts, R. E. Stratmann, O. Yazyev, A. J. Austin, R. Cammi, C. Pomelli, J. W. Ochterski, R. L. Martin, K. Morokuma, V. G. Zakrzewski, G. A. Voth, P. Salvador, J. J. Dannenberg, S. Dapprich, A. D. Daniels, O. Farkas, J. B. Foresman, J. V. Ortiz, J. Cioslowski, and D. J. Fox, Gaussian, Inc., Wallingford CT, **2009**.

### 13. NMR Spectra.

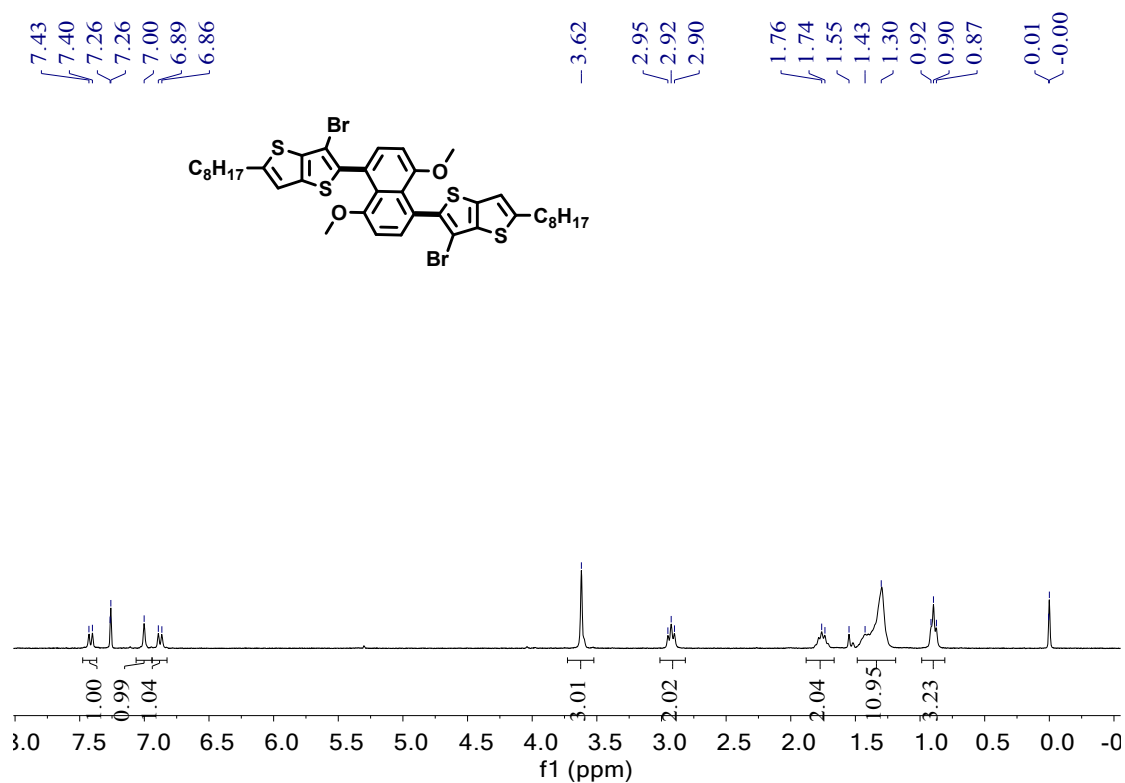

Figure S15. <sup>1</sup>H NMR spectrum of **3a** in CDCl<sub>3</sub> (25°C).

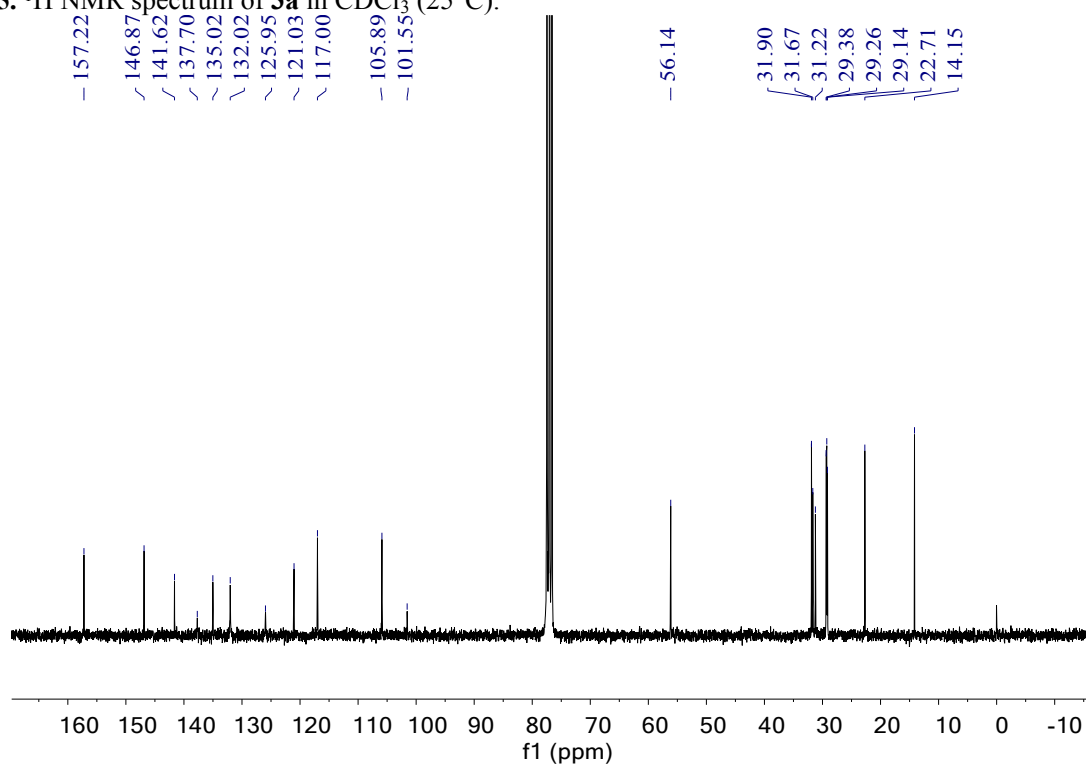

Figure S16. <sup>13</sup>C NMR spectrum of **3a** in CDCl<sub>3</sub> (25°C).

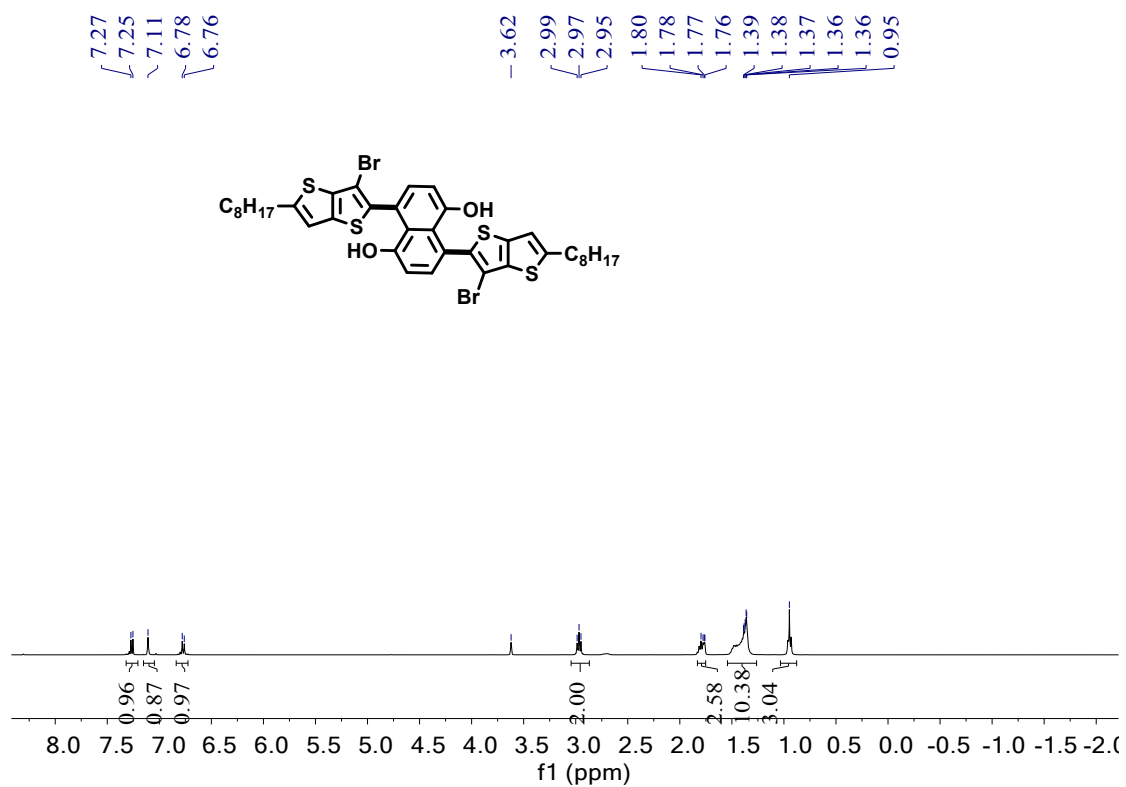

Figure S17. <sup>1</sup>H NMR spectrum of **3b** in [D<sub>8</sub>]THF (25°C).

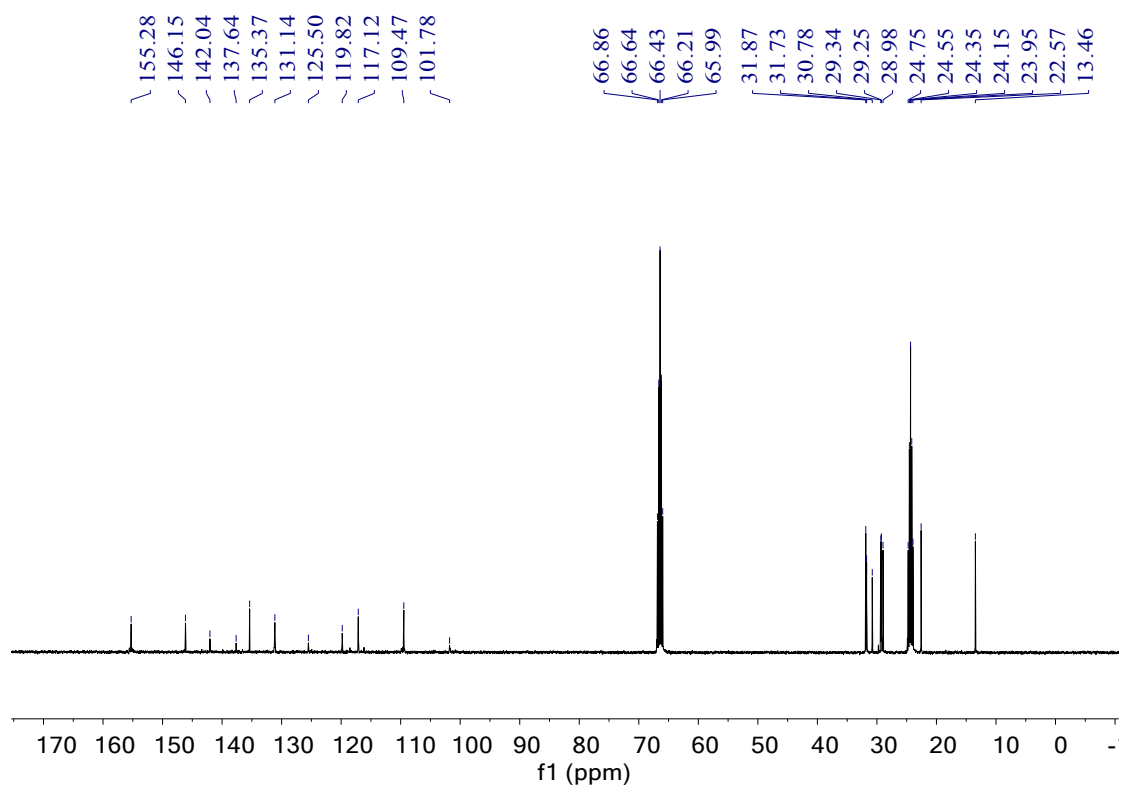

Figure S18. <sup>13</sup>C NMR spectrum of **3b** in [D<sub>8</sub>]THF (25°C).



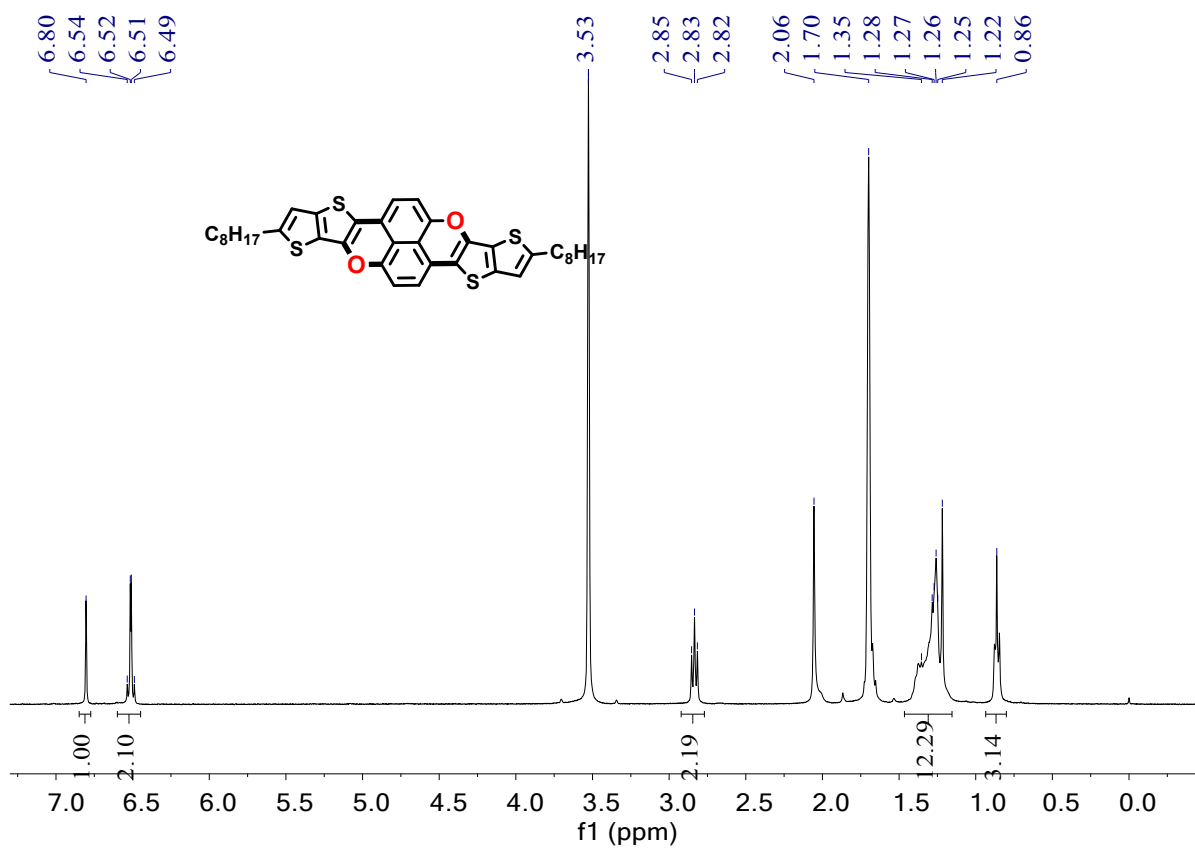

Figure S19.  $^1\text{H}$  NMR spectrum of TTCTC in  $[\text{D}_8]\text{THF}/\text{CS}_2$  v/v = 1:4 (25°C).

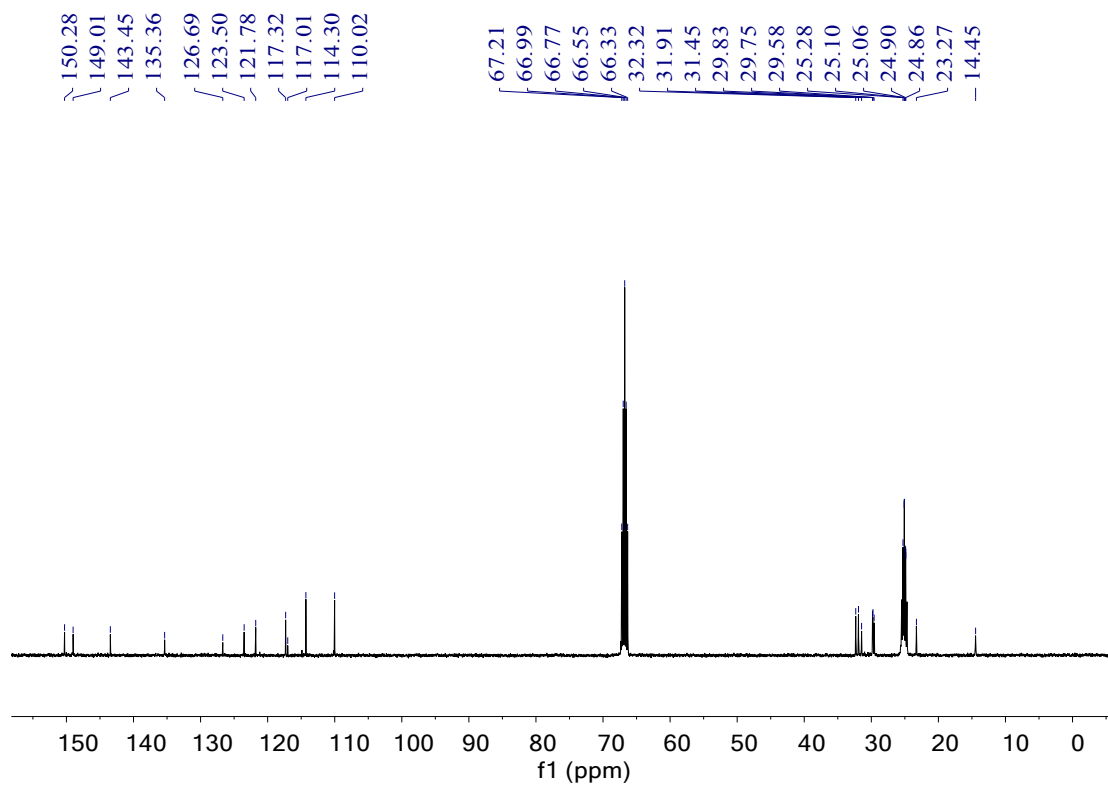

Figure S20.  $^{13}\text{C}$  NMR spectrum of TTCTC in  $[\text{D}_8]\text{THF}/\text{CS}_2$  v/v = 1:4 (25°C).

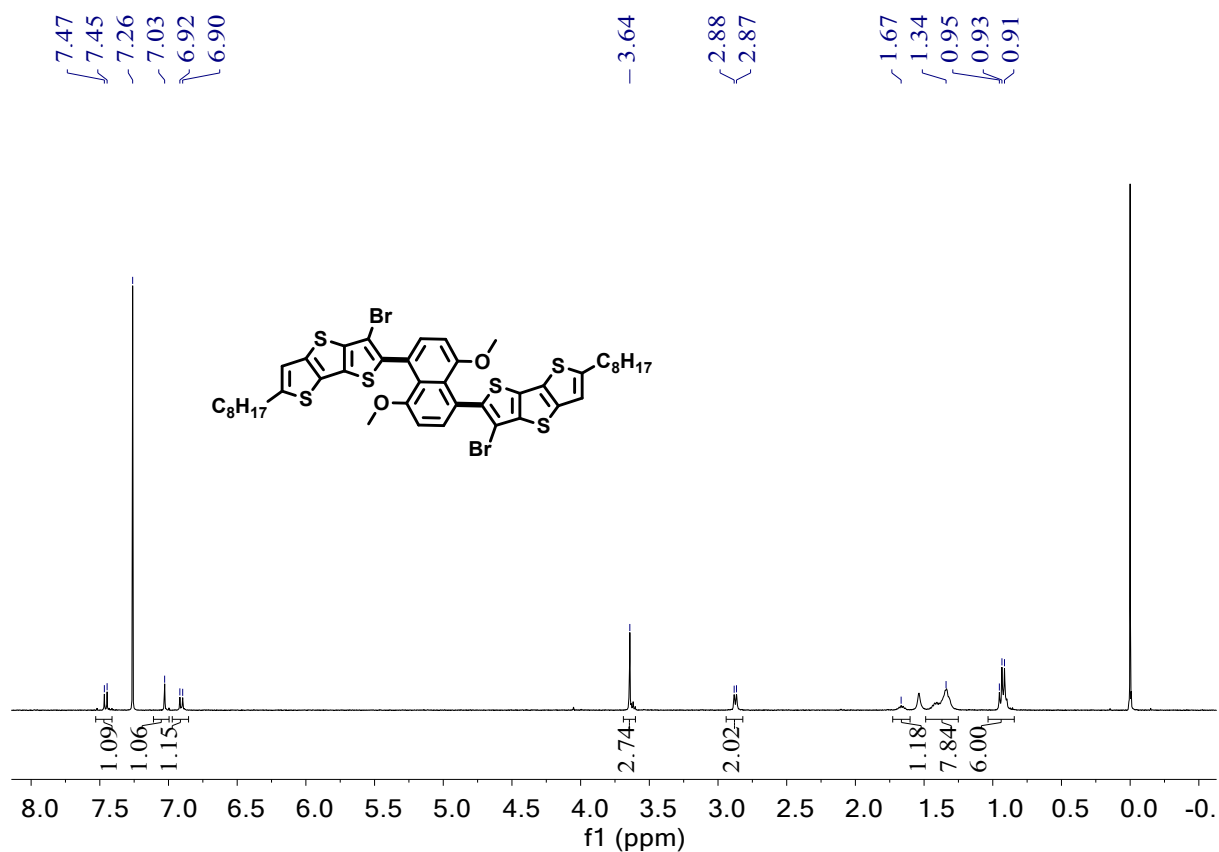

Figure S21. <sup>1</sup>H NMR spectrum of **4a** in CDCl<sub>3</sub> (25°C).

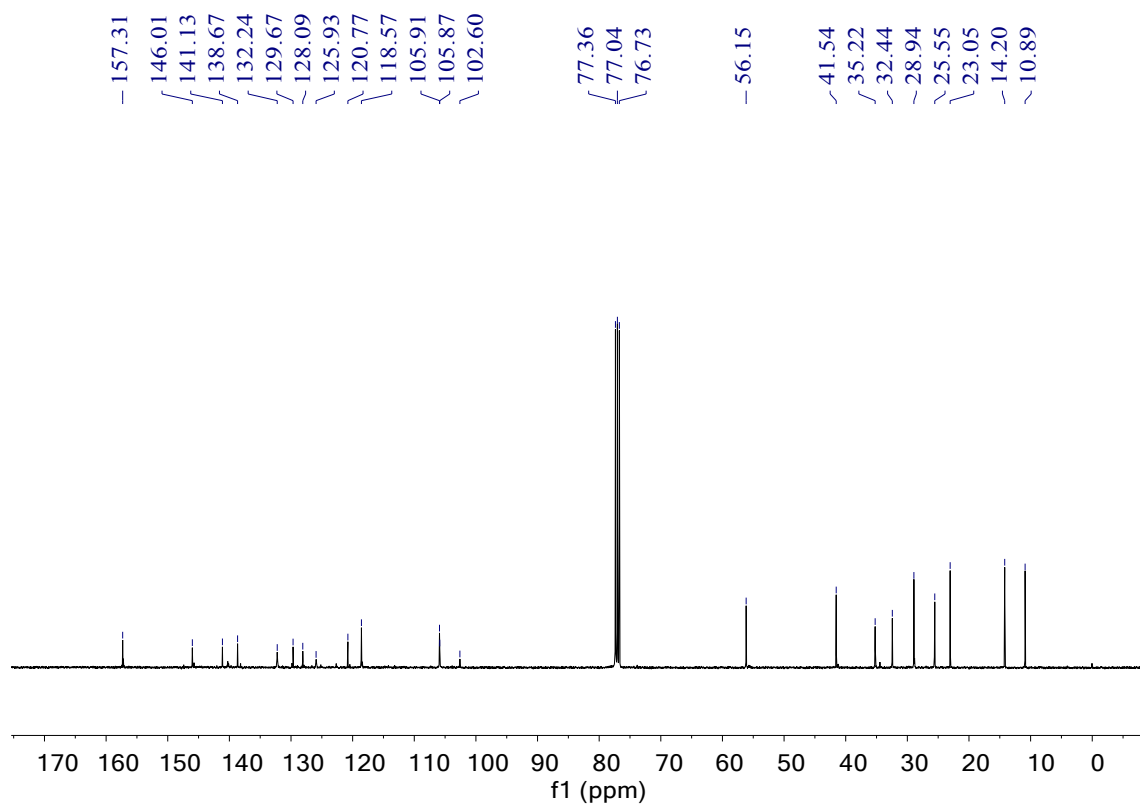

Figure S22. <sup>13</sup>C NMR spectrum of **4a** in CDCl<sub>3</sub> (25°C).

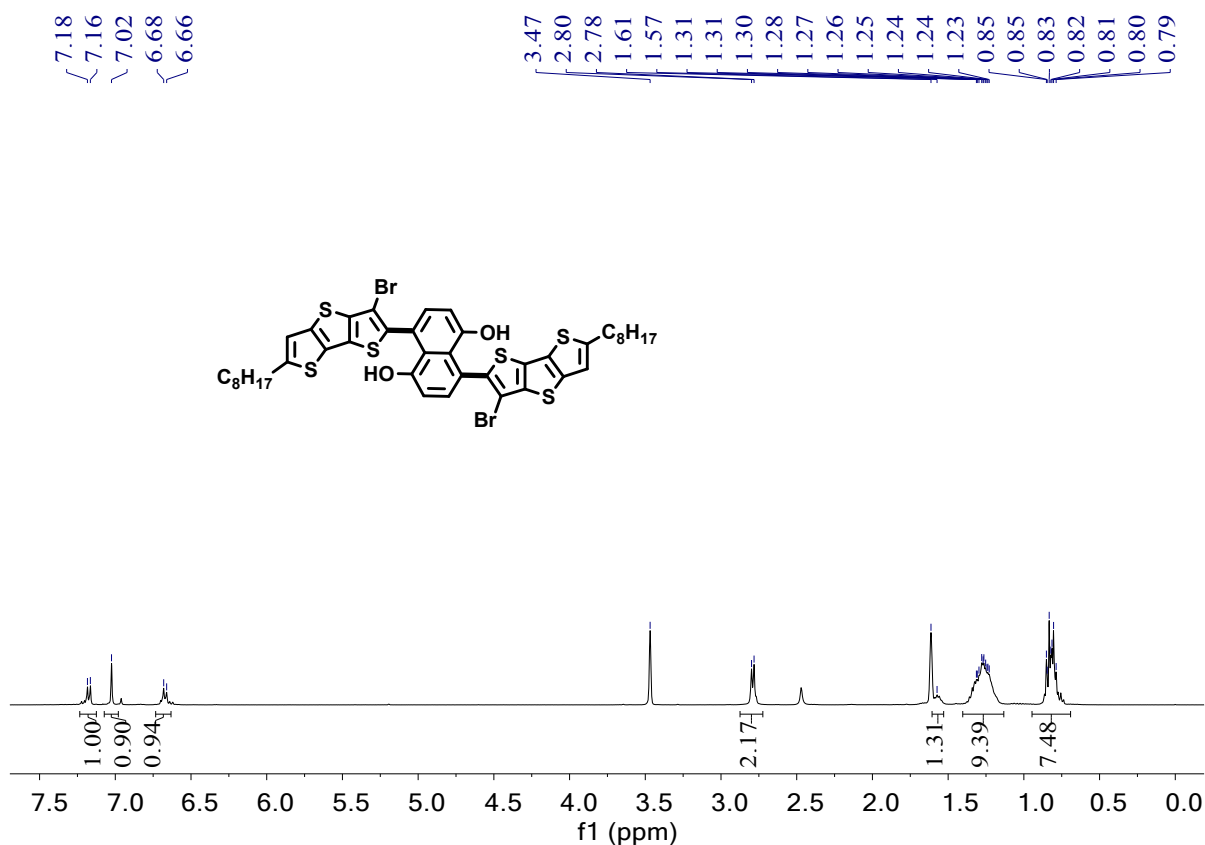

Figure S23. <sup>1</sup>H NMR spectrum of **4b** in [D<sub>8</sub>]THF (25°C).

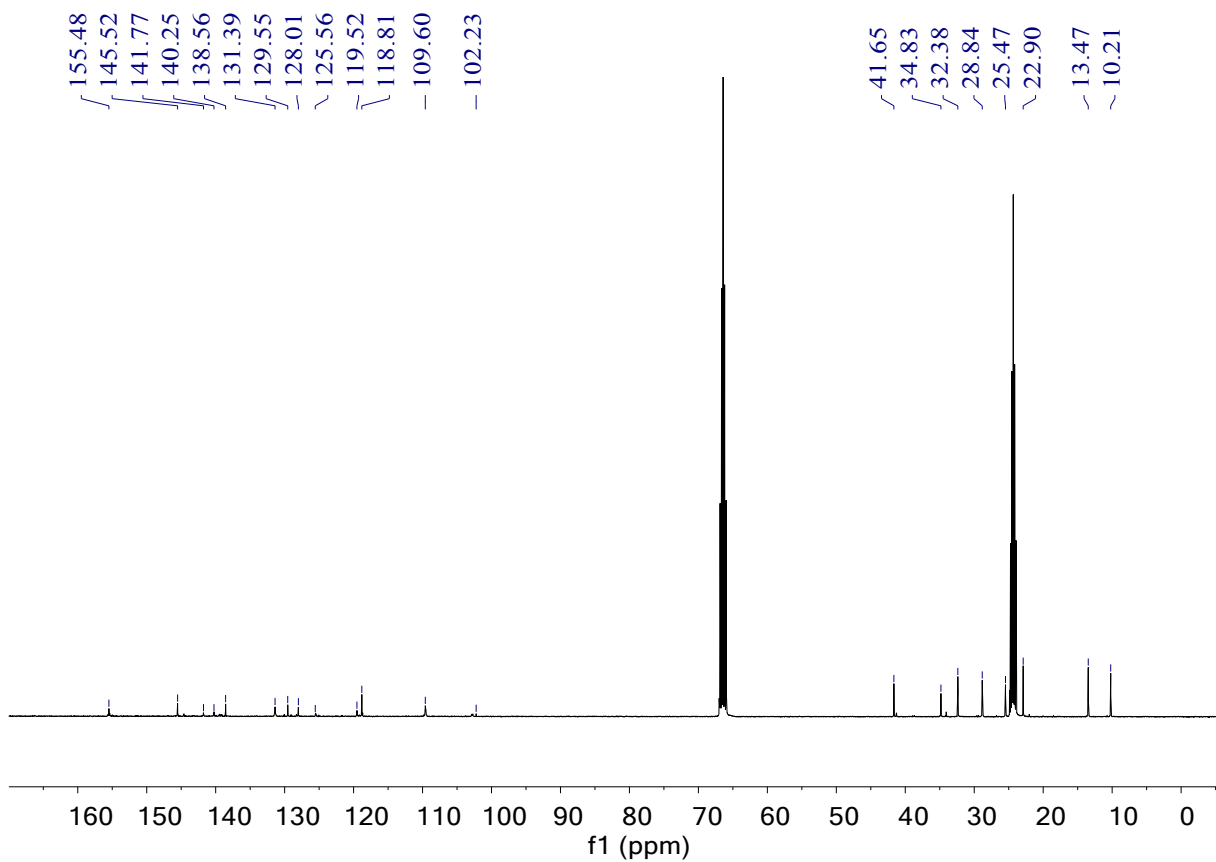

Figure S24. <sup>13</sup>C NMR spectrum of **4b** in [D<sub>8</sub>]THF (25°C).

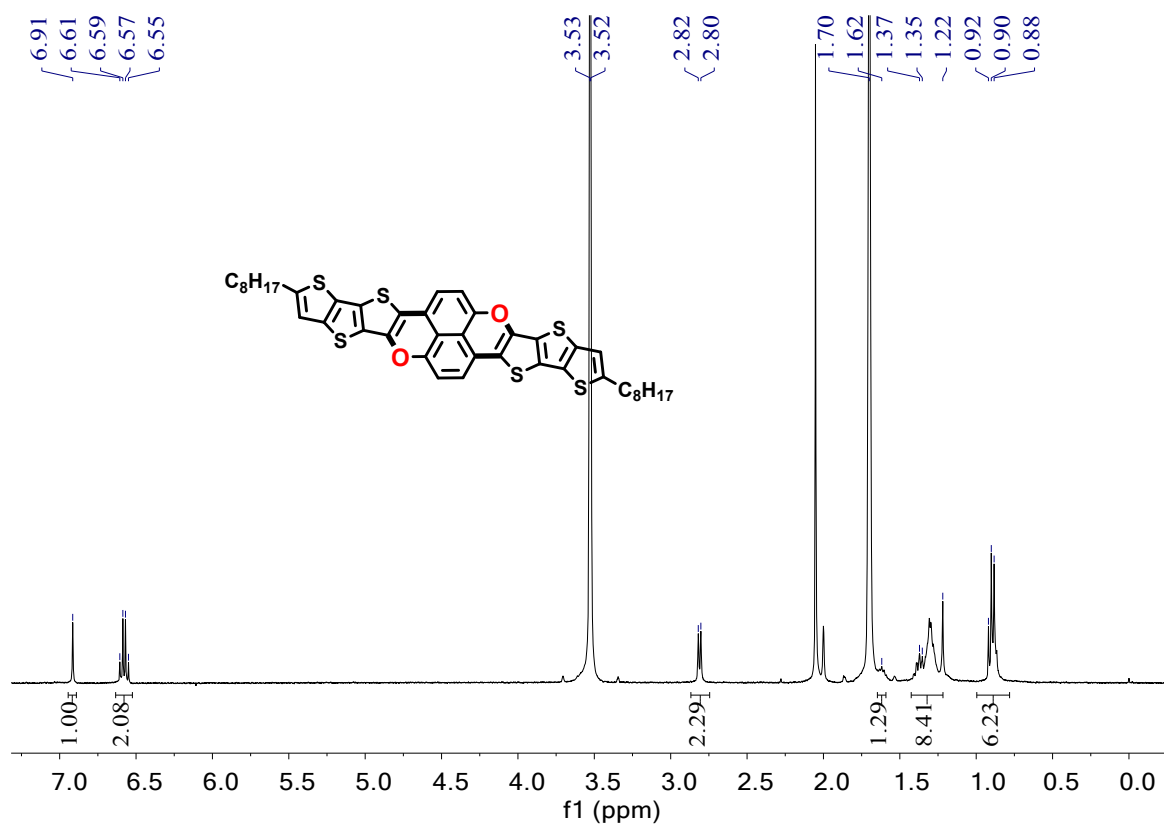

Figure S25.  $^1\text{H}$  NMR spectrum of TTTCTTTC in  $[\text{D}_8]\text{THF}/\text{CS}_2$  v/v = 1:4 (25°C).

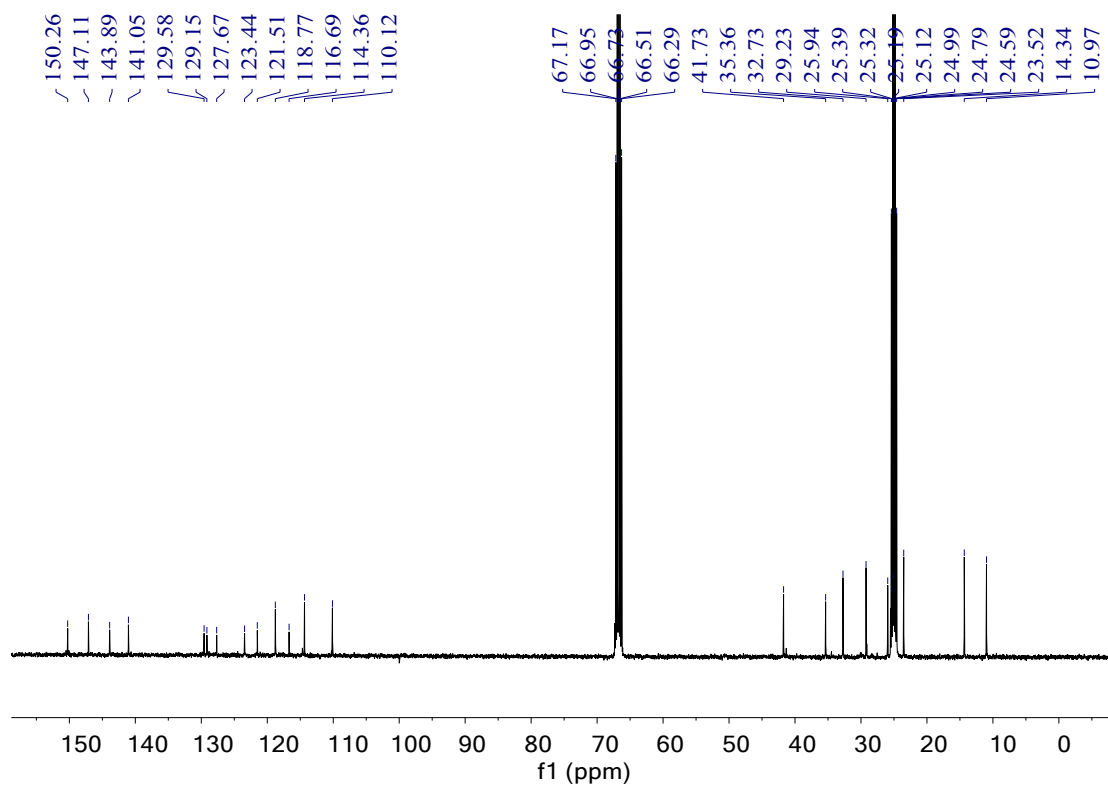

Figure S26.  $^{13}\text{C}$  NMR spectrum of TTTCTTTC in  $[\text{D}_8]\text{THF}/\text{CS}_2$  v/v = 1:4 (25°C).
